# Supplementary material for: Depressive Symptoms of Public Health Medical Residents during the COVID-19 Pandemic, a Nation-Wide Survey: The PHRASI Study
Source: MDPI journal article supplement (doi:10.3390/ijerph20095620), 2023-04-24
Supplement: s1 [file s1]

**Figure S1.** Multicollinearity analysis

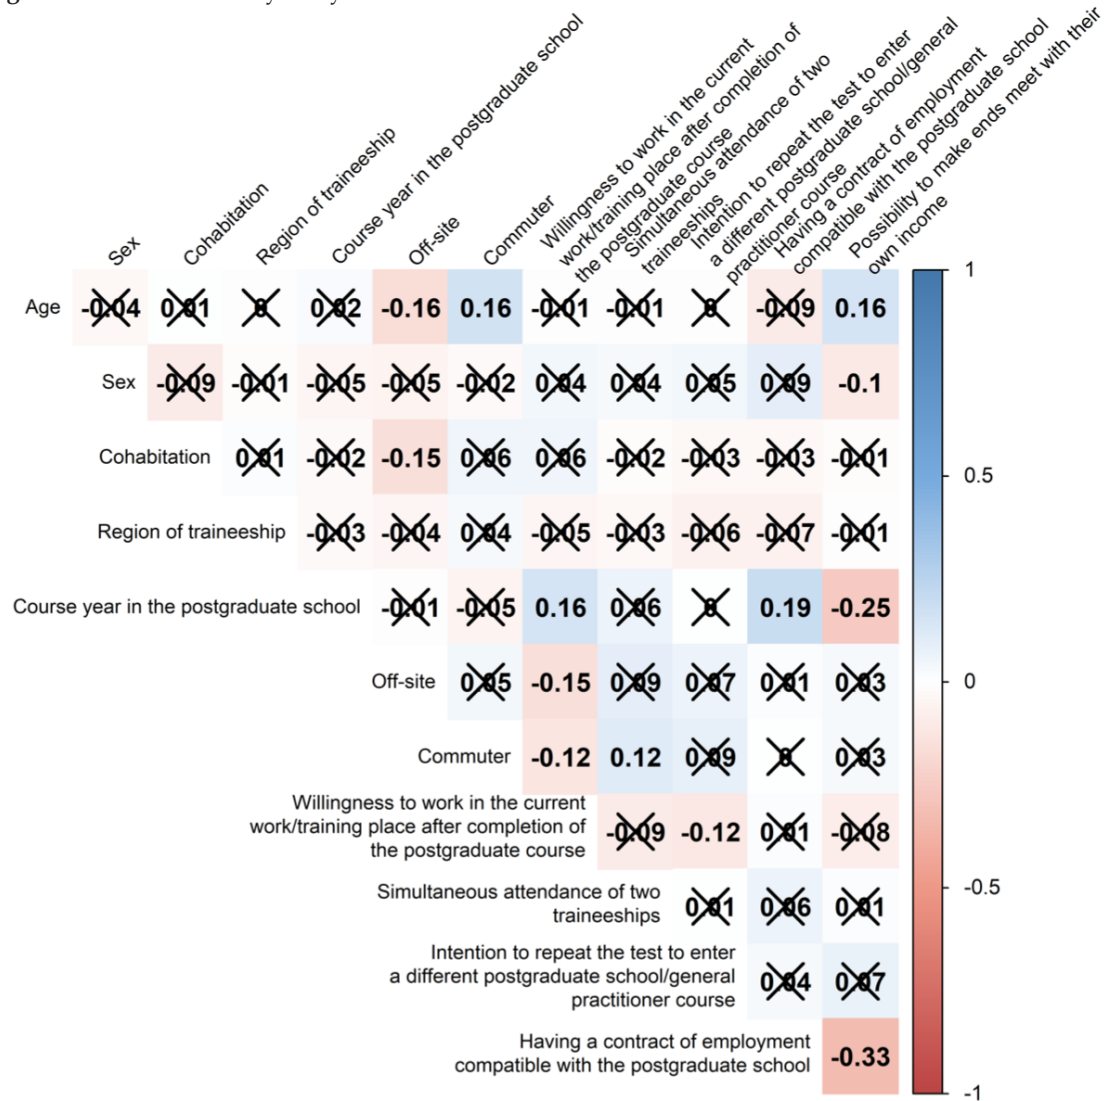

**Table S1.** Relations between socio-demographic characteristics and depressive symptoms (PHQ-9 $\geq$ 5).

| Characteristic             | No depressive symptoms<br>(PHQ-9<5) | Depressive symptoms<br>(PHQ-9 $\geq$ 5) | p-value <sup>2</sup> |
|----------------------------|-------------------------------------|-----------------------------------------|----------------------|
|                            | N = 148 <sup>1</sup>                | N = 231 <sup>1</sup>                    |                      |
| <b>Age [median, (IQR)]</b> | 30 (28.00, 34)                      | 31 (29.00, 33)                          | 0.4                  |
| <b>Sex</b>                 |                                     |                                         |                      |
| Female                     | 82 (55.41%)                         | 137 (59.31%)                            | 0.5                  |
| Male                       | 66 (44.59%)                         | 94 (40.69%)                             |                      |
| <b>Region of residence</b> |                                     |                                         |                      |
| Center                     | 41 (27.70%)                         | 55 (23.81%)                             | 0.5                  |
| North                      | 56 (37.84%)                         | 101 (43.72%)                            |                      |
| South and islands          | 51 (34.46%)                         | 75 (32.47%)                             |                      |
| <b>Cohabitation</b>        |                                     |                                         |                      |
| Alone                      | 37 (25.00%)                         | 61 (26.41%)                             | 0.8                  |

|                                                                                                           |              |              |        |
|-----------------------------------------------------------------------------------------------------------|--------------|--------------|--------|
| With Others                                                                                               | 111 (75.00%) | 170 (73.59%) |        |
| <b>Number of children</b>                                                                                 |              |              |        |
| 0                                                                                                         | 129 (87.16%) | 198 (85.71%) |        |
| 1                                                                                                         | 11 (7.43%)   | 21 (9.09%)   | 0.9    |
| >1                                                                                                        | 8 (5.41%)    | 12 (5.19%)   |        |
| <b>Region of traineeship</b>                                                                              |              |              |        |
| Center                                                                                                    | 44 (29.73%)  | 69 (29.87%)  |        |
| North                                                                                                     | 67 (45.27%)  | 111 (48.05%) | 0.8    |
| South                                                                                                     | 37 (25.00%)  | 51 (22.08%)  |        |
| <b>Course year in the postgraduate school</b>                                                             |              |              |        |
| 1st biennium                                                                                              | 120 (81.08%) | 172 (74.46%) | 0.13   |
| 2nd biennium                                                                                              | 28 (18.92%)  | 59 (25.54%)  |        |
| <b>Off-site</b>                                                                                           |              |              |        |
| No                                                                                                        | 76 (51.35%)  | 135 (58.44%) | 0.2    |
| Yes                                                                                                       | 72 (48.65%)  | 96 (41.56%)  |        |
| <b>Commuter</b>                                                                                           |              |              |        |
| No                                                                                                        | 108 (72.97%) | 150 (64.94%) | 0.10   |
| Yes                                                                                                       | 40 (27.03%)  | 81 (35.06%)  |        |
| <b>Willingness to work in the current work/training place after completion of the postgraduate course</b> |              |              |        |
| No                                                                                                        | 38 (25.68%)  | 87 (37.66%)  | 0.015  |
| Yes                                                                                                       | 110 (74.32%) | 144 (62.34%) |        |
| <b>Simultaneous attendance of two traineeships</b>                                                        |              |              |        |
| No                                                                                                        | 132 (89.19%) | 189 (81.82%) | 0.052  |
| Yes                                                                                                       | 16 (10.81%)  | 42 (18.18%)  |        |
| <b>Intention to repeat the test to enter a different postgraduate school/general practitioner course</b>  |              |              |        |
| No                                                                                                        | 139 (93.92%) | 176 (76.19%) |        |
| Maybe                                                                                                     | 7 (4.73%)    | 39 (16.88%)  | <0.001 |
| Yes                                                                                                       | 2 (1.35%)    | 16 (6.93%)   |        |
| <b>Having a contract of employment compatible with the postgraduate school</b>                            |              |              |        |
| No                                                                                                        | 101 (68.24%) | 141 (61.04%) | 0.2    |

|                                                                 |             |              |       |
|-----------------------------------------------------------------|-------------|--------------|-------|
| Yes                                                             | 47 (31.76%) | 90 (38.96%)  |       |
| <hr/>                                                           |             |              |       |
| Capacity to make ends meet with the own income                  |             |              |       |
| Easily                                                          | 72 (48.65%) | 90 (38.96%)  | 0.063 |
| Hardly                                                          | 76 (51.35%) | 141 (61.04%) |       |
| <hr/>                                                           |             |              |       |
| <sup>1</sup> Median (IQR); n (%)                                |             |              |       |
| <sup>2</sup> Wilcoxon rank sum test; Pearson's Chi-squared test |             |              |       |

**Table S2.** Multivariate logistic regression adjusted for age, sex and for each single variable (PQH-9≥5).

| Variable                                                                                                            | aOR related to depressive symptoms (PHQ≥5) | 95% CI        | p-value |
|---------------------------------------------------------------------------------------------------------------------|--------------------------------------------|---------------|---------|
| <b>Region of traineeship (ref. Center)</b>                                                                          |                                            |               |         |
| North                                                                                                               | 1.056                                      | 0.649 - 1.719 | 0.826   |
| South and islands                                                                                                   | 0.877                                      | 0.497 - 1.548 | 0.651   |
| <b>Cohabitation (ref. Alone)</b>                                                                                    |                                            |               |         |
| With Others                                                                                                         | 0.912                                      | 0.567 - 1.468 | 0.706   |
| <b>Off-site (ref. No)</b>                                                                                           |                                            |               |         |
| Yes                                                                                                                 | 0.749                                      | 0.491 - 1.142 | 0.180   |
| <b>Commuter (ref. No)</b>                                                                                           |                                            |               |         |
| Yes                                                                                                                 | 1.443                                      | 0.912 - 2.282 | 0.117   |
| <b>Willingness to work in the current work/training place after completion of the postgraduate course (ref. No)</b> |                                            |               |         |
| Yes                                                                                                                 | 0.575                                      | 0.365 - 0.907 | 0.017   |
| <b>Simultaneous attendance of two traineeships (ref. No)</b>                                                        |                                            |               |         |
| Yes                                                                                                                 | 1.853                                      | 0.999 - 3.440 | 0.050   |
| <b>Intention to repeat the test to enter a different postgraduate school/general practitioner course (ref. No)</b>  |                                            |               |         |

|                                                                                          |       |                |        |
|------------------------------------------------------------------------------------------|-------|----------------|--------|
| Maybe                                                                                    | 4.453 | 1.930 - 10.275 | <0.001 |
| Yes                                                                                      | 6.475 | 1.461 - 28.689 | 0.014  |
| <b>Having a contract of employment compatible with the postgraduate school (ref. No)</b> |       |                |        |
| Yes                                                                                      | 1.414 | 0.910 - 2.195  | 0.123  |
| <b>Capacity to make ends meet with their own income (ref. Easily)</b>                    |       |                |        |
| Hardly                                                                                   | 1.458 | 0.954 - 2.228  | 0.082  |

**Table S3.** Relations between socio-demographic characteristics and depressive symptoms (PHQ-9≥5), stratified by sex.

| Characteristic      | Female                                                  |                                                       |                      | Male                                                    |                                                      |                      |
|---------------------|---------------------------------------------------------|-------------------------------------------------------|----------------------|---------------------------------------------------------|------------------------------------------------------|----------------------|
|                     | No depressive symptoms (PHQ-9<5)<br>N = 82 <sup>1</sup> | Depressive symptoms (PHQ-9≥5)<br>N = 137 <sup>1</sup> | p-value <sup>2</sup> | No depressive symptoms (PHQ-9<5)<br>N = 66 <sup>1</sup> | Depressive symptoms (PHQ-9≥5)<br>N = 94 <sup>1</sup> | p-value <sup>2</sup> |
| Age [median, (IQR)] | 30<br>(28.00, 34)                                       | 31 (29.00, 34)                                        | 0.2                  | 30<br>(29.00, 34)                                       | 30 (29.00, 33)                                       | 0.7                  |
| Region of residence |                                                         |                                                       |                      |                                                         |                                                      |                      |
| Center              | 20 (24.39%)                                             | 33 (24.09%)                                           | >0.9                 | 21 (31.82%)                                             | 22 (23.40%)                                          | 0.3                  |
| North               | 36 (43.90%)                                             | 62 (45.26%)                                           |                      | 20 (30.30%)                                             | 39 (41.49%)                                          |                      |
| South and islands   | 26 (31.71%)                                             | 42 (30.66%)                                           |                      | 25 (37.88%)                                             | 33 (35.11%)                                          |                      |
| Cohabitation        |                                                         |                                                       |                      |                                                         |                                                      |                      |
| Alone               | 18 (21.95%)                                             | 31 (22.63%)                                           | >0.9                 | 19 (28.79%)                                             | 30 (31.91%)                                          | 0.7                  |
| With Others         | 64 (78.05%)                                             | 106 (77.37%)                                          |                      | 47 (71.21%)                                             | 64 (68.09%)                                          |                      |
| Number of children  |                                                         |                                                       |                      |                                                         |                                                      |                      |
| 0                   | 69 (84.15%)                                             | 112 (81.75%)                                          | 0.8                  | 60 (90.91%)                                             | 86 (91.49%)                                          | >0.9                 |
| 1                   | 7 (8.54%)                                               | 16 (11.68%)                                           |                      | 4 (6.06%)                                               | 5 (5.32%)                                            |                      |
| >1                  | 6 (7.32%)                                               | 9 (6.57%)                                             |                      | 2 (3.03%)                                               | 3 (3.19%)                                            |                      |

| Region of traineeship                                                                              |             |              |       |             |             |       |
|----------------------------------------------------------------------------------------------------|-------------|--------------|-------|-------------|-------------|-------|
| Center                                                                                             | 23 (28.05%) | 39 (28.47%)  |       | 21 (31.82%) | 30 (31.91%) |       |
| North                                                                                              | 39 (47.56%) | 69 (50.36%)  | 0.9   | 28 (42.42%) | 42 (44.68%) | >0.9  |
| South and islands                                                                                  | 20 (24.39%) | 29 (21.17%)  |       | 17 (25.76%) | 22 (23.40%) |       |
| Course year in the Italian specialization school                                                   |             |              |       |             |             |       |
| 1st biennium                                                                                       | 63 (76.83%) | 102 (74.45%) |       | 57 (86.36%) | 70 (74.47%) |       |
| 2nd biennium                                                                                       | 19 (23.17%) | 35 (25.55%)  | 0.7   | 9 (13.64%)  | 24 (25.53%) | 0.067 |
| Off-site                                                                                           |             |              |       |             |             |       |
| No                                                                                                 | 37 (45.12%) | 80 (58.39%)  |       | 39 (59.09%) | 55 (58.51%) |       |
| Yes                                                                                                | 45 (54.88%) | 57 (41.61%)  | 0.057 | 27 (40.91%) | 39 (41.49%) | >0.9  |
| Commuter                                                                                           |             |              |       |             |             |       |
| No                                                                                                 | 56 (68.29%) | 91 (66.42%)  |       | 52 (78.79%) | 59 (62.77%) |       |
| Yes                                                                                                | 26 (31.71%) | 46 (33.58%)  | 0.8   | 14 (21.21%) | 35 (37.23%) | 0.030 |
| Willingness to work in the current work/training place after completion of the postgraduate course |             |              |       |             |             |       |
| No                                                                                                 | 22 (26.83%) | 54 (39.42%)  |       | 16 (24.24%) | 33 (35.11%) |       |
| Yes                                                                                                | 60 (73.17%) | 83 (60.58%)  | 0.058 | 50 (75.76%) | 61 (64.89%) | 0.14  |
| Simultaneous attendance of two traineeships                                                        |             |              |       |             |             |       |
| No                                                                                                 | 73 (89.02%) | 115 (83.94%) |       | 59 (89.39%) | 74 (78.72%) |       |
| Yes                                                                                                | 9 (10.98%)  | 22 (16.06%)  | 0.3   | 7 (10.61%)  | 20 (21.28%) | 0.076 |
| Intention to repeat specialization schools/general practitioner test                               |             |              |       |             |             |       |

|                                                                                                                                                        |             |              |        |             |             |       |
|--------------------------------------------------------------------------------------------------------------------------------------------------------|-------------|--------------|--------|-------------|-------------|-------|
| No                                                                                                                                                     | 79 (96.34%) | 106 (77.37%) |        | 60 (90.91%) | 70 (74.47%) |       |
| Maybe                                                                                                                                                  | 2 (2.44%)   | 23 (16.79%)  | <0.001 | 5 (7.58%)   | 16 (17.02%) | 0.029 |
| Yes                                                                                                                                                    | 1 (1.22%)   | 8 (5.84%)    |        | 1 (1.52%)   | 8 (8.51%)   |       |
| <b>Having a contract of employment compatible with the postgraduate school</b>                                                                         |             |              |        |             |             |       |
| No                                                                                                                                                     | 58 (70.73%) | 90 (65.69%)  |        | 43 (65.15%) | 51 (54.26%) |       |
| Yes                                                                                                                                                    | 24 (29.27%) | 47 (34.31%)  | 0.4    | 23 (34.85%) | 43 (45.74%) | 0.2   |
| <b>Capacity to make ends meet with their own income</b>                                                                                                |             |              |        |             |             |       |
| Easily                                                                                                                                                 | 40 (48.78%) | 44 (32.12%)  |        | 32 (48.48%) | 46 (48.94%) |       |
| Hardly                                                                                                                                                 | 42 (51.22%) | 93 (67.88%)  | 0.014  | 34 (51.52%) | 48 (51.06%) | >0.9  |
| <sup>1</sup> Median (IQR); n (%)                                                                                                                       |             |              |        |             |             |       |
| <sup>2</sup> Wilcoxon rank sum test; Pearson's Chi-squared test; Fisher's Exact Test for Count Data with simulated p-value (based on 10000 replicates) |             |              |        |             |             |       |

**Table S4.** Negative binomial regression adjusted for sex and age.

| Variable                                                                                                            | aRR   | 95% CI        | p-value |
|---------------------------------------------------------------------------------------------------------------------|-------|---------------|---------|
| <b>Cohabitation (ref. Alone)</b>                                                                                    |       |               |         |
| With Others                                                                                                         | 0.854 | 0.72 - 1.012  | 0.069   |
| <b>Region of traineeship (ref. Center)</b>                                                                          |       |               |         |
| North                                                                                                               | 1.030 | 0.863 - 1.229 | 0.745   |
| South                                                                                                               | 1.011 | 0.821 - 1.245 | 0.921   |
| <b>Off-site (ref. No)</b>                                                                                           |       |               |         |
| Yes                                                                                                                 | 1.022 | 0.877 - 1.192 | 0.779   |
| <b>Commuter (ref. No)</b>                                                                                           |       |               |         |
| Yes                                                                                                                 | 1.067 | 0.907 - 1.256 | 0.435   |
| <b>Willingness to work in the current work/training place after completion of the postgraduate course (ref. No)</b> |       |               |         |

|                                                                                                                    |       |               |       |
|--------------------------------------------------------------------------------------------------------------------|-------|---------------|-------|
| Yes                                                                                                                | 0.754 | 0.646 - 0.882 | 0.000 |
| <b>Simultaneous attendance of two traineeships (ref. No)</b>                                                       |       |               |       |
| Yes                                                                                                                | 1.288 | 1.051 - 1.578 | 0.015 |
| <b>Intention to repeat the test to enter a different postgraduate school/general practitioner course (ref. No)</b> |       |               |       |
| Maybe                                                                                                              | 1.686 | 1.364 - 2.085 | 0.000 |
| Yes                                                                                                                | 1.677 | 1.212 - 2.321 | 0.002 |
| <b>Having a contract of employment compatible with the postgraduate school (ref. No)</b>                           |       |               |       |
| Yes                                                                                                                | 1.051 | 0.898 - 1.231 | 0.535 |
| <b>Possibility to make ends meet with their own income (ref. Easily)</b>                                           |       |               |       |
| Hardly                                                                                                             | 1.132 | 0.97 - 1.321  | 0.116 |
